# Supplementary material for: Exohedral Functionalization of Fullerene by Substituents Controlling of Molecular Organization for Spontaneous C60 Dimerization in Liquid Crystal Solutions and in a Bulk Controlled by a Potential
Source: MDPI journal article supplement (doi:10.3390/polym13162816), 2021-08-22
Supplement: s1 [file s1]

# Exohedral functionalization of fullerene by substituents controlling of molecular organization for spontaneous C<sub>60</sub> dimerization in liquid crystal solutions and in a bulk controlled by a potential

Malgorzata Czichy <sup>1,\*</sup>, Alessia Colombo <sup>2</sup>, Pawel Wagner <sup>3</sup>, Patryk Janasik <sup>1</sup>, Claudia Dragonetti <sup>2</sup>, Rathinam Raja <sup>4</sup>, David L. Officer <sup>3</sup> and Leeyih Wang <sup>4,5</sup>

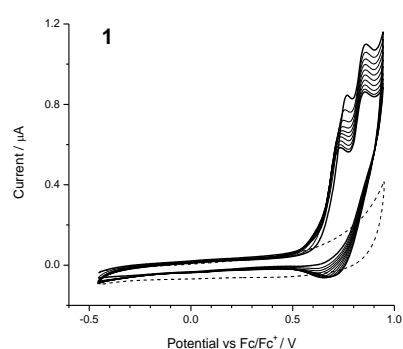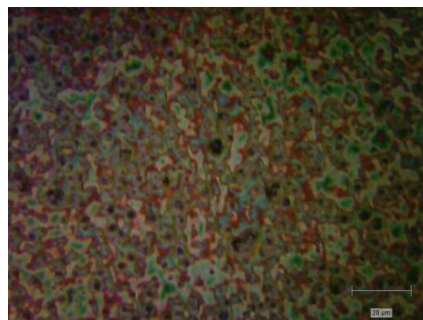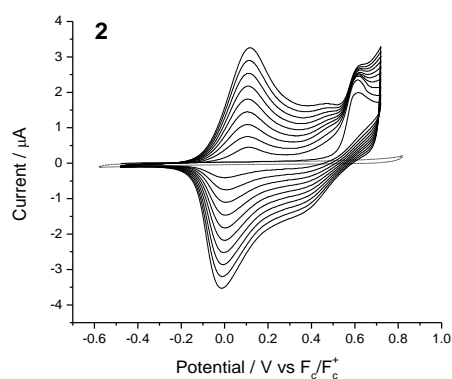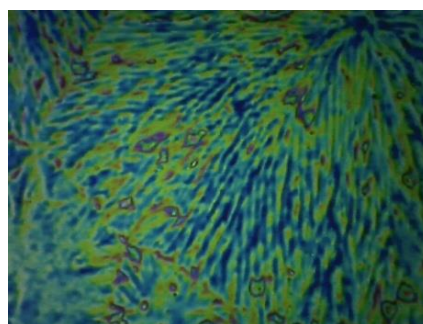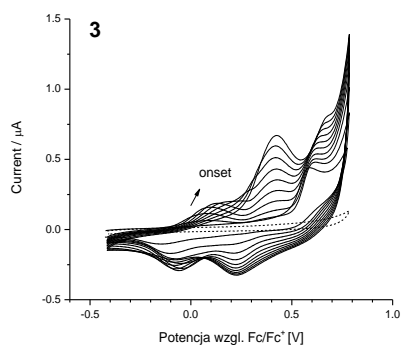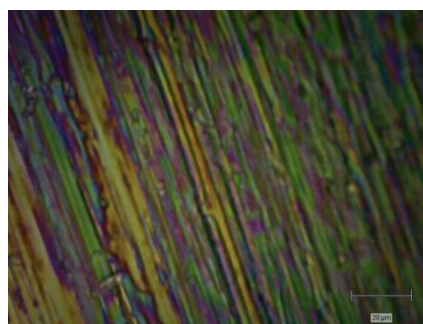

**Figure S1.** Voltammograms of oxidative electropolymerization of **1**, **2** and **3** in precursor solution (1 mM) in E1/dichloromethane (0.1 M) to produce polymers **p(1)**, **p(2)** and **p(3)** (left) and images of these polymers surfaces obtained using an optical Raman microscope under laser excitation of 514 nm (right).

**Table S1.** Shape of frontier orbitals of **2** calculated at B3LYP/6-31G(d,p).  
The isovalue is equal to 0.03 e<sup>-</sup>/au<sup>3</sup> in each case.

| HOMO-1                                                                              | HOMO                                                                                 | LUMO                                                                                  |
|-------------------------------------------------------------------------------------|--------------------------------------------------------------------------------------|---------------------------------------------------------------------------------------|
| 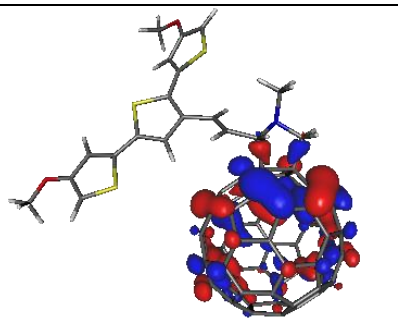   |    |    |
| -5.32                                                                               | -5.15                                                                                | -3.33                                                                                 |
| LUMO+1                                                                              | LUMO+2                                                                               | LUMO+3                                                                                |
|   |   |   |
| -2.99                                                                               | -2.77                                                                                | -2.20                                                                                 |
| LUMO+4                                                                              | LUMO+5                                                                               | LUMO+6                                                                                |
|  |  |  |
| -1.81                                                                               | -1.59                                                                                | -1.56                                                                                 |

**Table S2.** Shape of frontier orbitals of **2 (without alkoxy group)** calculated at B3LYP/6-31G(d,p). The isovalue is equal to 0.03 e/au<sup>3</sup> in each case.

| HOMO-1                                                                              | HOMO                                                                                | LUMO                                                                                  |
|-------------------------------------------------------------------------------------|-------------------------------------------------------------------------------------|---------------------------------------------------------------------------------------|
| 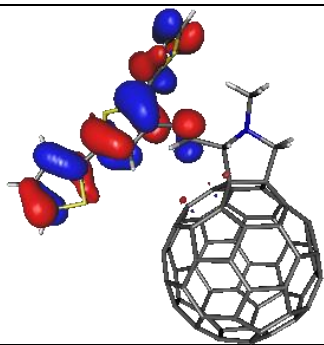   |    |    |
| -5.38                                                                               | -5.32                                                                               | -3.33                                                                                 |
| LUMO+1                                                                              | LUMO+2                                                                              | LUMO+3                                                                                |
|   |   |   |
| -3.00                                                                               | -2.77                                                                               | -2.20                                                                                 |
| LUMO+4                                                                              | LUMO+5                                                                              | LUMO+6                                                                                |
|  |  |  |
| -1.81                                                                               | -1.59                                                                               | -1.50                                                                                 |

**Table S3.** Shape of frontier orbitals of **3** calculated at B3LYP/6-31G(d,p).  
The isovalue is equal to 0.03 e<sup>-</sup>/au<sup>3</sup> in each case.

|                                                                                    |                                                                                    |                                                                                      |
|------------------------------------------------------------------------------------|------------------------------------------------------------------------------------|--------------------------------------------------------------------------------------|
| <b>HOMO-1</b>                                                                      | <b>HOMO</b>                                                                        | <b>LUMO</b>                                                                          |
| 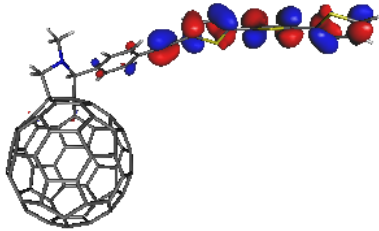  |   |   |
| <b>-5.36</b>                                                                       | <b>-5.34</b>                                                                       | <b>-3.35</b>                                                                         |
| <b>LUMO+1</b>                                                                      | <b>LUMO+2</b>                                                                      | <b>LUMO+3</b>                                                                        |
|   |   |   |
| <b>-3.01</b>                                                                       | <b>-2.79</b>                                                                       | <b>-2.22</b>                                                                         |
| <b>LUMO+4</b>                                                                      | <b>LUMO+5</b>                                                                      | <b>LUMO+6</b>                                                                        |
|  |  |  |
| <b>-1.82</b>                                                                       | <b>-1.63</b>                                                                       | <b>-1.61</b>                                                                         |

**Table S4.** Spin density of reduced form of monomers calculated at B3LYP/6-31G(d), isovalue is equal to 0.005 e-/au<sup>3</sup>.

| 2                                                                                  | 3                                                                                   |
|------------------------------------------------------------------------------------|-------------------------------------------------------------------------------------|
| 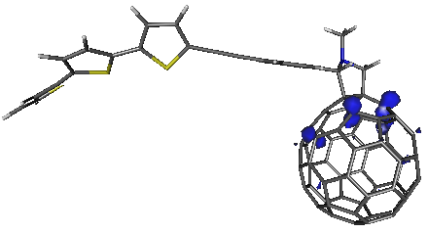  |   |
|   |   |
|  |  |

**Table S5.** Shape of frontier orbitals of (2)<sub>2</sub> dimer in neutral state, calculated at B3LYP/6-31G(d,p).  
The isovalue is equal to 0.03 e<sup>-</sup>/au<sup>3</sup> in each case.

|                                                                                     |                                                                                     |                                                                                       |
|-------------------------------------------------------------------------------------|-------------------------------------------------------------------------------------|---------------------------------------------------------------------------------------|
| <b>HOMO-3</b>                                                                       | <b>HOMO-2</b>                                                                       | <b>HOMO-1</b>                                                                         |
| 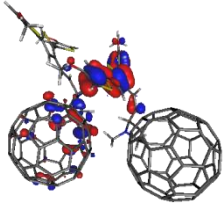   |    |    |
| <b>-5.37</b>                                                                        | <b>-5.31</b>                                                                        | <b>-5.24</b>                                                                          |
| <b>HOMO</b>                                                                         | <b>LUMO</b>                                                                         | <b>LUMO+1</b>                                                                         |
|    |    |    |
| <b>-4.99</b>                                                                        | <b>-3.33</b>                                                                        | <b>-3.30</b>                                                                          |
| <b>LUMO+2</b>                                                                       | <b>LUMO+3</b>                                                                       | <b>LUMO+4</b>                                                                         |
|   |   |   |
| <b>-3.04</b>                                                                        | <b>-3.00</b>                                                                        | <b>-2.81</b>                                                                          |
| <b>LUMO+5</b>                                                                       | <b>LUMO+6</b>                                                                       | <b>LUMO+7</b>                                                                         |
|  |  |  |
| <b>-2.78</b>                                                                        | <b>-2.21</b>                                                                        | <b>-2.19</b>                                                                          |
| <b>LUMO+8</b>                                                                       | <b>LUMO+9</b>                                                                       | <b>LUMO+10</b>                                                                        |
|  |  |  |
| <b>-1.84</b>                                                                        | <b>-1.81</b>                                                                        | <b>-1.73</b>                                                                          |
| <b>LUMO+11</b>                                                                      |                                                                                     |                                                                                       |
|  |                                                                                     |                                                                                       |
| <b>-1.62</b>                                                                        |                                                                                     |                                                                                       |



**Table S6.** Shape of frontier orbitals of (3)<sub>2</sub> dimer in neutral state, calculated at B3LYP/6-31G(d,p).  
The isovalue is equal to 0.03 e<sup>-</sup>/au<sup>3</sup> in each case.

|                                                                                     |                                                                                     |                                                                                       |
|-------------------------------------------------------------------------------------|-------------------------------------------------------------------------------------|---------------------------------------------------------------------------------------|
| <b>HOMO-3</b>                                                                       | <b>HOMO-2</b>                                                                       | <b>HOMO-1</b>                                                                         |
| 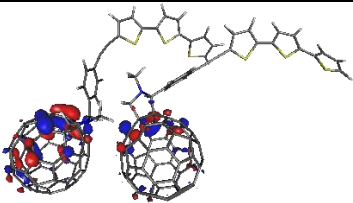   |    |    |
| -5.35                                                                               | -5.31                                                                               | -5.30                                                                                 |
| <b>HOMO</b>                                                                         | <b>LUMO</b>                                                                         | <b>LUMO+1</b>                                                                         |
|    |    |    |
| -5.26                                                                               | -3.37                                                                               | -3.37                                                                                 |
| <b>LUMO+2</b>                                                                       | <b>LUMO+3</b>                                                                       | <b>LUMO+4</b>                                                                         |
|   |   |   |
| -3.03                                                                               | -3.02                                                                               | -2.84                                                                                 |
| <b>LUMO+5</b>                                                                       | <b>LUMO+6</b>                                                                       | <b>LUMO+7</b>                                                                         |
|  |  |  |
| -2.78                                                                               | -2.24                                                                               | -2.23                                                                                 |
| <b>LUMO+8</b>                                                                       | <b>LUMO+9</b>                                                                       | <b>LUMO+10</b>                                                                        |
|  |  |  |
| -1.85                                                                               | -1.83                                                                               | -1.82                                                                                 |
| <b>LUMO+11</b>                                                                      |                                                                                     |                                                                                       |
|  |                                                                                     |                                                                                       |
| -1.73                                                                               |                                                                                     |                                                                                       |

**Table S7.** Optimized structures of (2)<sub>2</sub> and (3)<sub>2</sub> dimers in neutral state, calculated at  $\omega$ B97X-D functional combined with 6-31G(d,p) basis set.

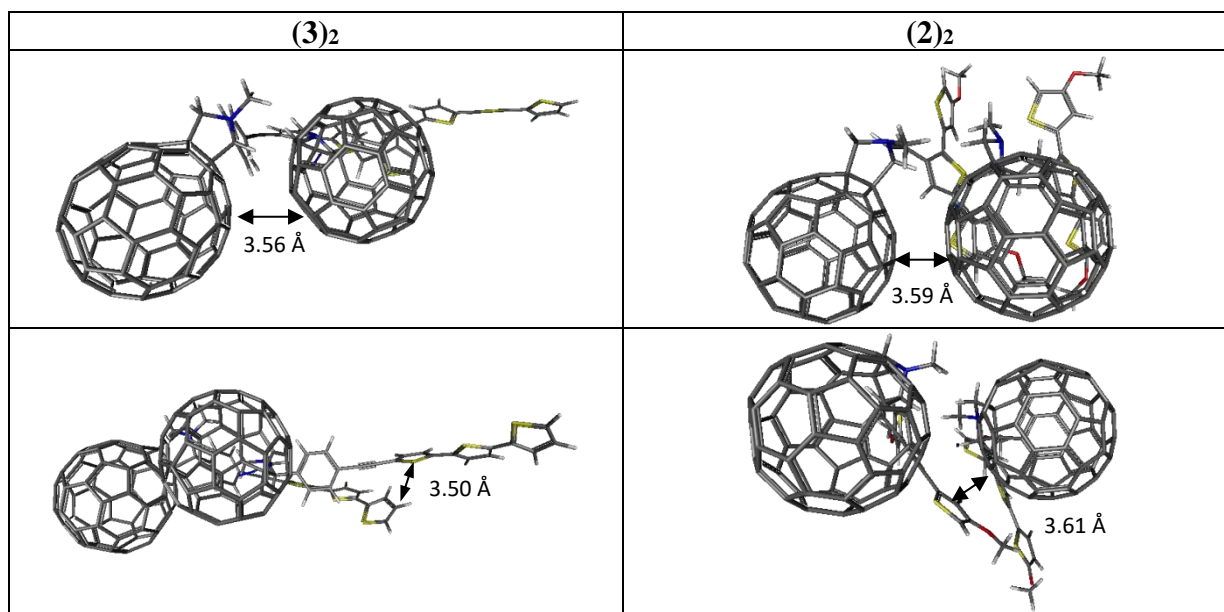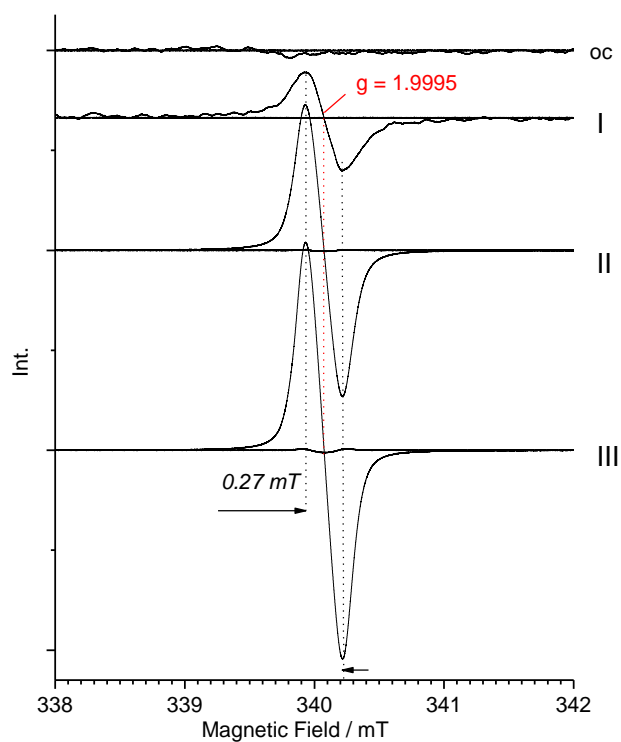

**Figure S2.** The change in ESR signal at I (first), II (second) and third (III) reduction peak in C<sub>60</sub> solution in E1/DCM, 0.6 mT (modulation width); 200 (amplitude) (oc – open cell, without polarization).



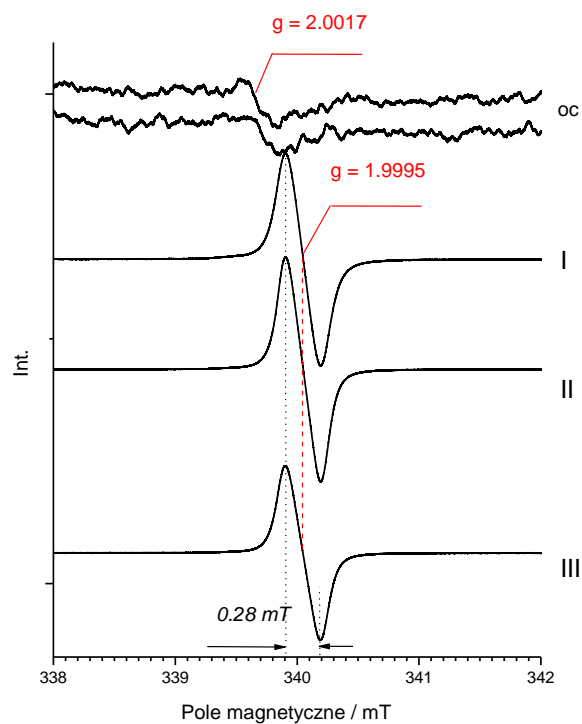

**Figure S3.** The change in ESR signal at I (first), II (second) and third (III) reduction peak in **1** solution in E1/DCM, 0.6 mT (modulation width); 200 (amplitude) (oc – open cell, without polarization).

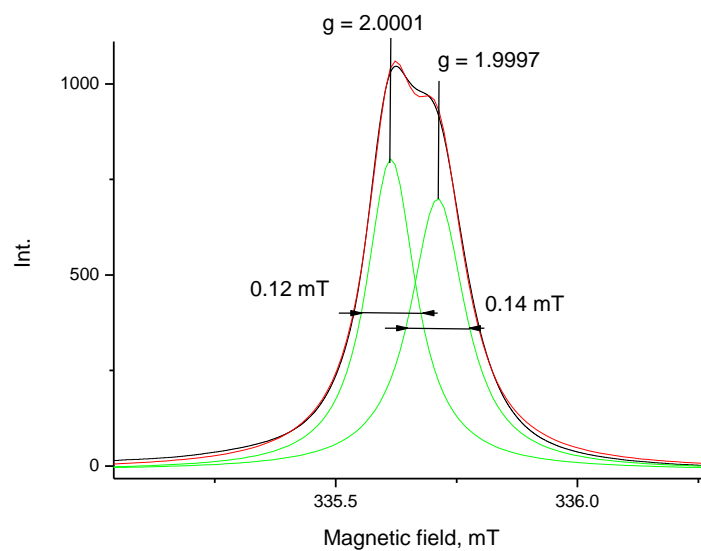

**Figure S4.** Graphical method showing the decomposition of absorption ESR signal into two components under potential of B peak in **2** solution in E1/DCM, 0.6 mT (modulation width); 200 (amplitude).
